# Supplementary material for: Single-cell RNA sequencing reveals transcriptomic landscape and potential targets for human testicular ageing
Source: PubMed Central journal article supplement — Hum Reprod. 2024 Sep 6;39(10):2189–209. doi: 10.1093/humrep/deae199 (PMC11447013; doi:10.1093/humrep/deae199), 2024-09-06
Supplement: deae199_supplementary_figure_s1.pdf [file deae199_supplementary_figure_s1.pdf]

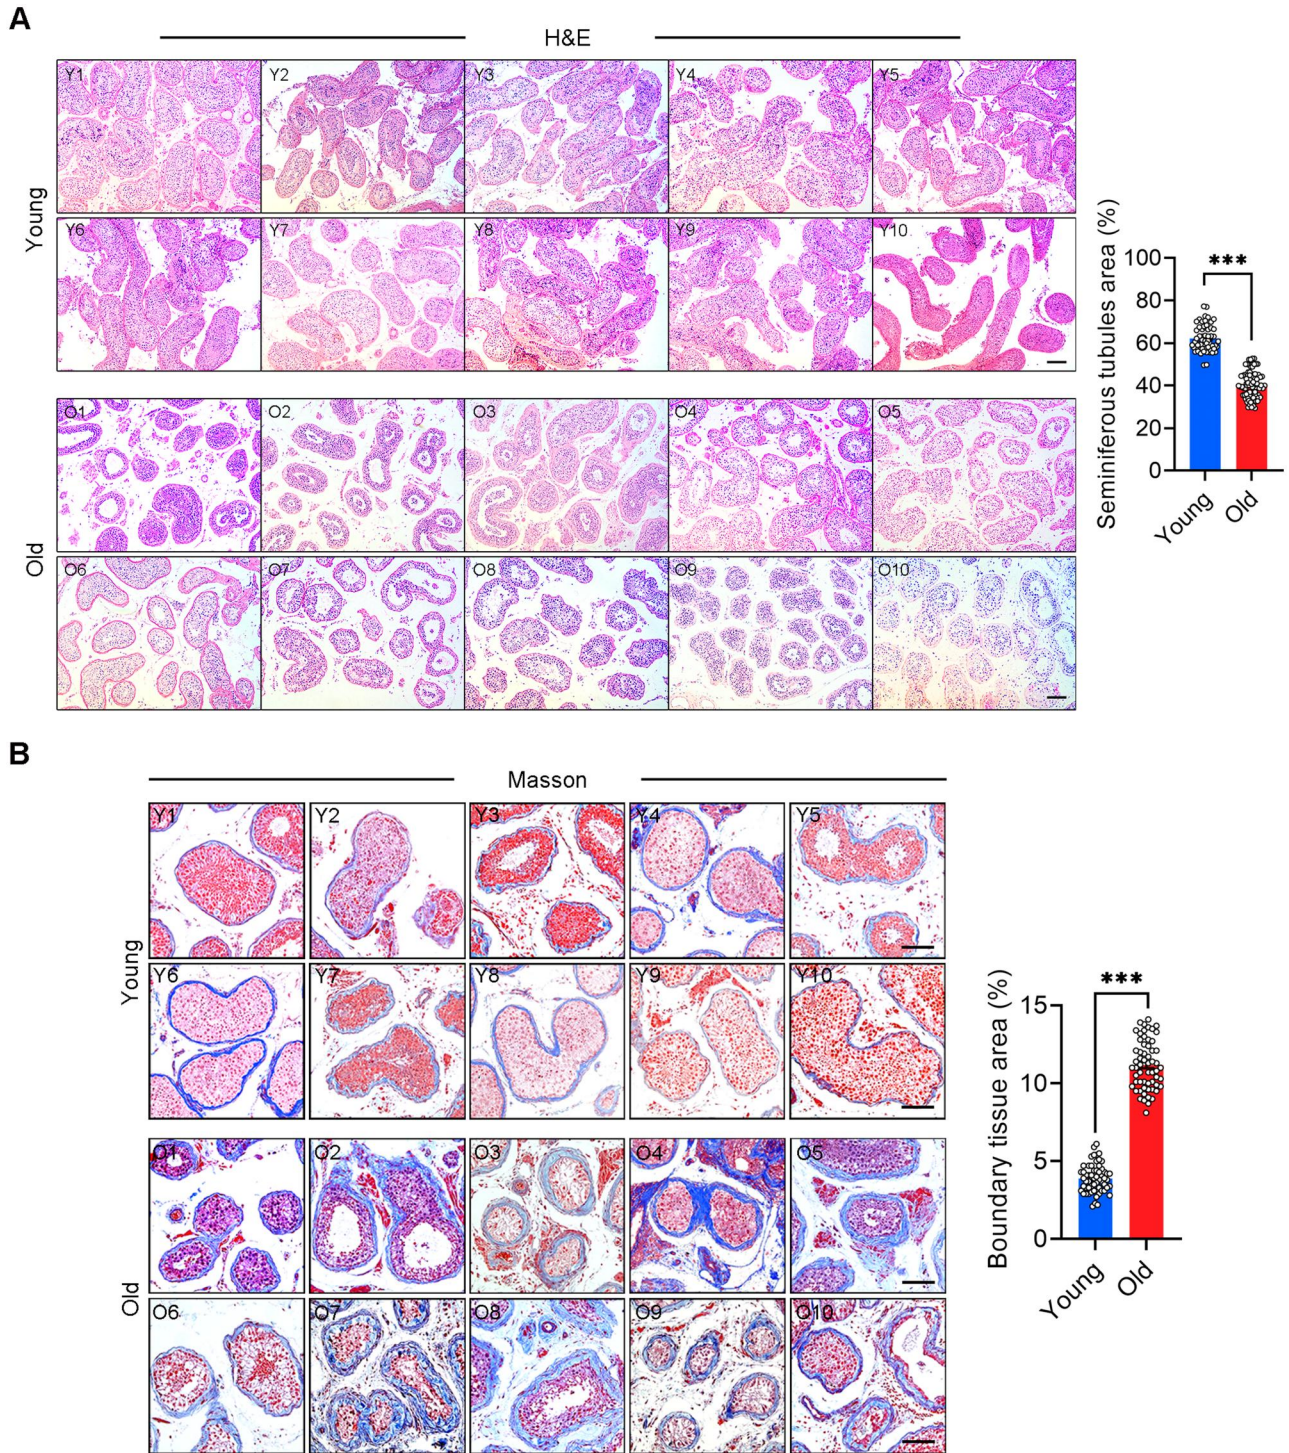

**Supplementary Figure S1. Histological comparison between young and old human testicular tissue, related to Fig. 1.** (A) Left: representative light micrographs of young and old human testis sections stained with H&E. Right: quantification of the average area of seminiferous tubules. Scale bar, 100  $\mu$ m. Bars represent the mean with SEM of 60 independent regions per group (Young, n = 10 samples; Old, n = 10 samples). Significance was determined by Student's t-test. \*\*\* $P$  < 0.001. (B) Left: representative light micrographs of Masson's trichrome staining of young and old human testis. Right: quantification of the average area of boundary tissue. Scale bar, 75  $\mu$ m. Bars represent the mean with SEM of 60 independent regions per group (Young, n = 10 samples; Old, n = 10 samples). Significance was determined by Student's t-test. \*\*\* $P$  < 0.001. H&E, haematoxylin and eosin staining; Masson, Masson's trichrome staining.
