# Supplementary material for: Single-cell RNA sequencing reveals transcriptomic landscape and potential targets for human testicular ageing
Source: PubMed Central journal article supplement — Hum Reprod. 2024 Sep 6;39(10):2189–209. doi: 10.1093/humrep/deae199 (PMC11447013; doi:10.1093/humrep/deae199), 2024-09-06
Supplement: deae199_supplementary_figure_s3.pdf [file deae199_supplementary_figure_s3.pdf]

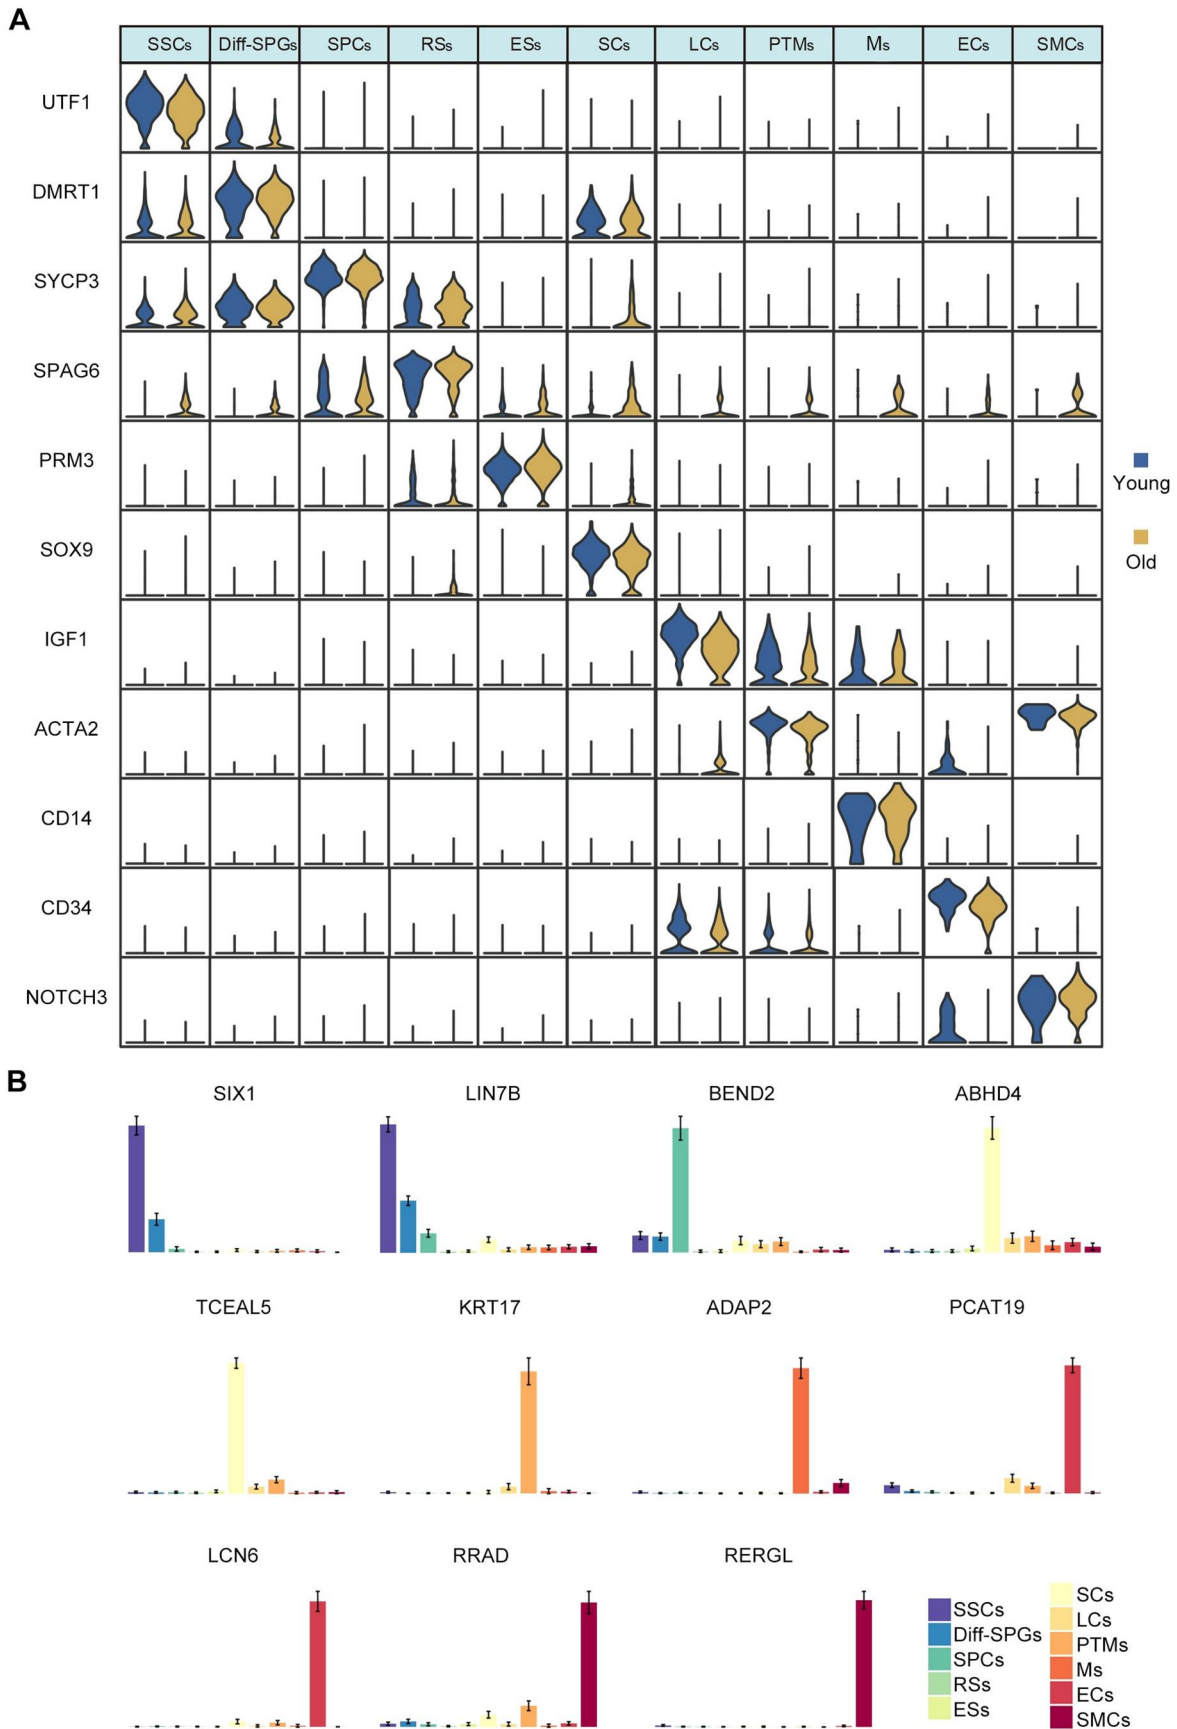

**Supplementary Figure S3.** The expression level of marker genes for each cell type; related to Fig. 1. (A) Violin plots showing expression levels of marker genes for each cell type in young and old human testis. (B) Bar plot showing the expression levels of representative new marker genes for various cell types.
