# Supplementary material for: Single-cell RNA sequencing reveals transcriptomic landscape and potential targets for human testicular ageing
Source: PubMed Central journal article supplement — Hum Reprod. 2024 Sep 6;39(10):2189–209. doi: 10.1093/humrep/deae199 (PMC11447013; doi:10.1093/humrep/deae199), 2024-09-06
Supplement: deae199_supplementary_figure_s4.pdf [file deae199_supplementary_figure_s4.pdf]

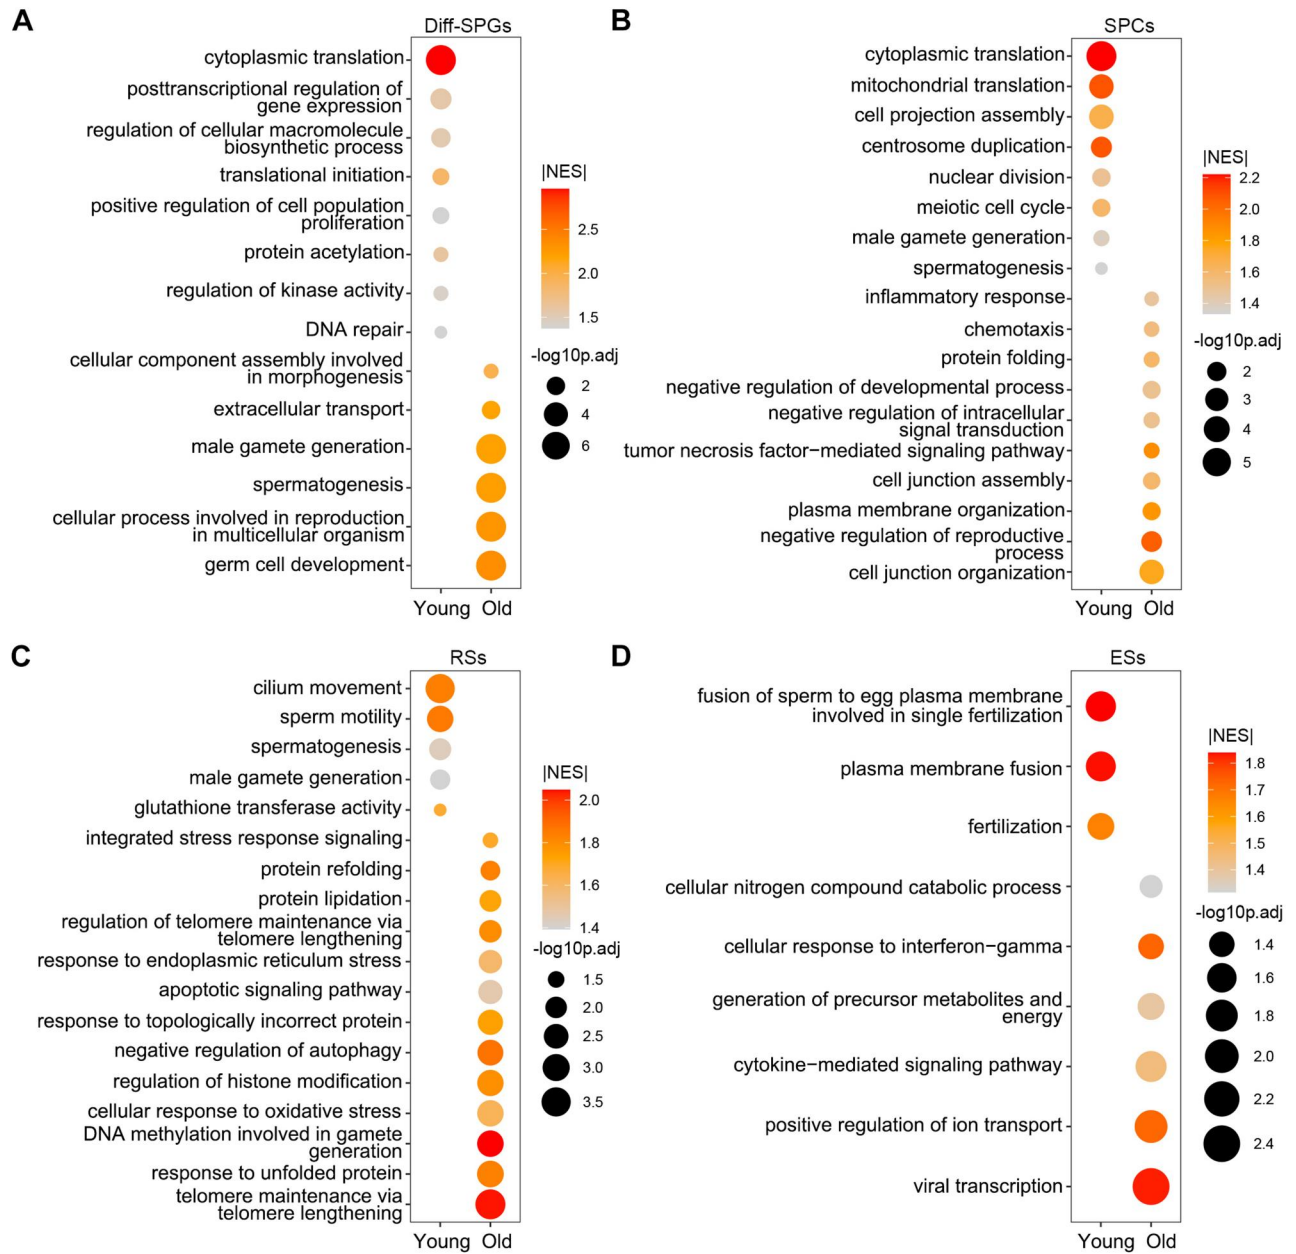

**Supplementary Figure S4.** GSEA-GO analysis in the different germ cell clusters of the young and old datasets; related to Fig. 3. (A–D) Representative aging-associated GO terms of DEGs in Diff-SPGs (A), SPCs (B), RSs (C), and ESs (D). Dot size indicates the range of  $-\log_{10}$  (adjusted P-value). The colour keys, ranging from grey to red (top) or grey to blue (bottom), indicate the absolute value of the NES. GSEA, Gene set enrichment analysis; GO, gene ontology; NES, normalized enrichment score; DEGs, differentially expressed genes.
