# Supplementary material for: Single-cell RNA sequencing reveals transcriptomic landscape and potential targets for human testicular ageing
Source: PubMed Central journal article supplement — Hum Reprod. 2024 Sep 6;39(10):2189–209. doi: 10.1093/humrep/deae199 (PMC11447013; doi:10.1093/humrep/deae199), 2024-09-06
Supplement: deae199_supplementary_figure_s5.pdf [file deae199_supplementary_figure_s5.pdf]

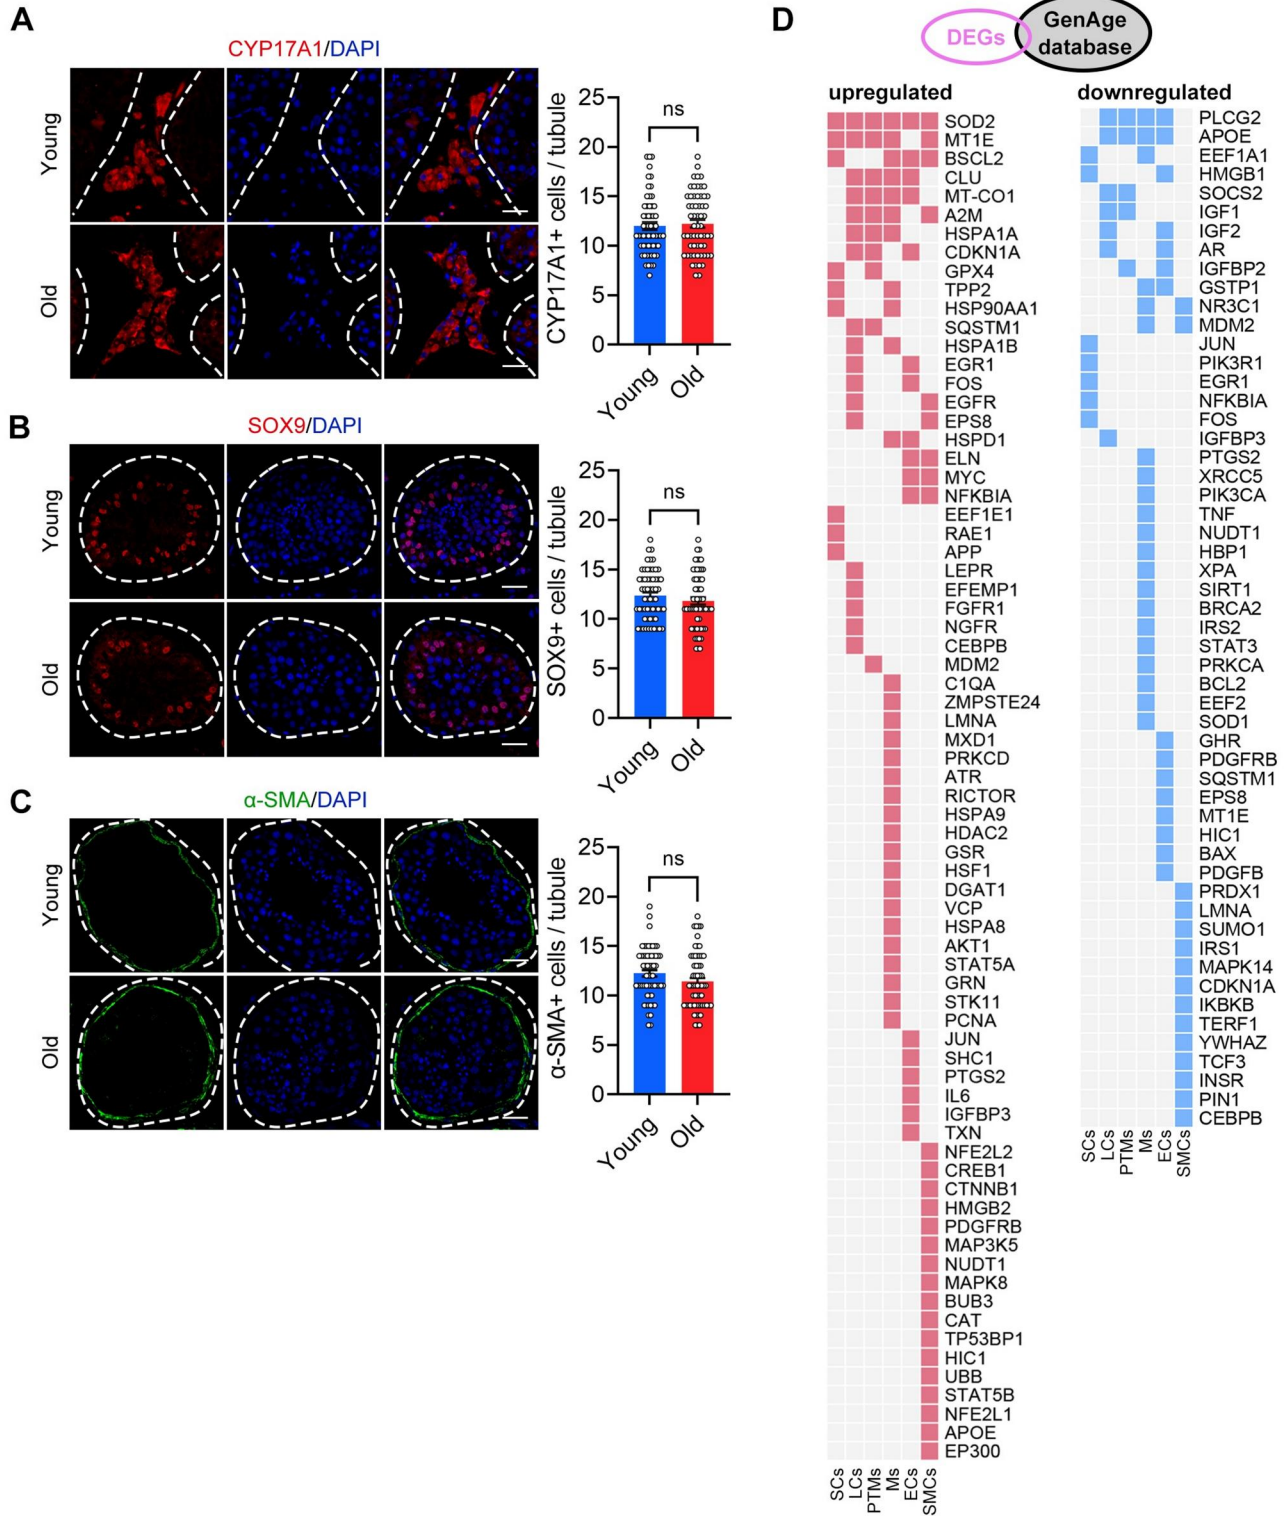

**Supplementary Figure S5. Changes in the cellular and transcriptional regulatory networks of somatic cell types during human testicular aging; related to Fig. 4.** (A–C) Immunostaining and quantification of CYP17A1 (A), SOX9 (B), and  $\alpha$ -SMA (C) in young and old human testis sections. Left, representative image of CYP17A1 (A), SOX9 (B), and  $\alpha$ -SMA (C) in human testis sections. Right, quantification of CYP17A1+ (A), SOX9+ (B), and  $\alpha$ -SMA+ (C) cells per seminiferous tubule. Scale bars, 35  $\mu$ m. Bars represent the mean with SEM of 60 independent tubules per group (Young, n = 10 samples; Old, n = 10 samples). Significance was determined by Student's t-test. ns = not significant. (D) Heatmap showing expression patterns of upregulated (red) and downregulated (blue) genes found in the GenAge database.
