# Supplementary material for: Single-cell RNA sequencing reveals transcriptomic landscape and potential targets for human testicular ageing
Source: PubMed Central journal article supplement — Hum Reprod. 2024 Sep 6;39(10):2189–209. doi: 10.1093/humrep/deae199 (PMC11447013; doi:10.1093/humrep/deae199), 2024-09-06
Supplement: deae199_supplementary_table_s1.pdf [file deae199_supplementary_table_s1.pdf]

**Supplementary Table S1.** The detailed clinical characteristics of donors; related to the Materials and Methods.

| Analysis                                       | Group | Patient ID | Age (years) | Height (cm) | Weight (kg) | FSH (U/l) | LH (U/l) | Total T (ng/ml) | E2 (pg/ml) | PRL (ng/ml) | PRO (ng/ml) | Diagnosis                     | Notes                           |
|------------------------------------------------|-------|------------|-------------|-------------|-------------|-----------|----------|-----------------|------------|-------------|-------------|-------------------------------|---------------------------------|
| Single-cell RNA seq;<br>Histological analysis. | Young | Y1         | 28          | 174         | 75          | 5.81      | 5.42     | 6.76            | 27         | 4.4         | 0.2         | Testicular teratoma           | Hormone test before surgery     |
| Single-cell RNA seq;<br>Histological analysis. | Young | Y2         | 24          | 175         | 70          |           |          |                 |            |             |             | Testicular Leydig cell tumour | No data of hormone test         |
| Single-cell RNA seq;<br>Histological analysis. | Young | Y3         | 31          | 177         | 74          | 4.46      | 3.2      | 5.44            | 23         | 14.16       | 0.3         | Obstructive azoospermia       | Hormone test before surgery     |
| Histological analysis                          | Young | Y4         | 24          | 173         | 73          | 3.84      | 6.52     | 5.36            | 32         | 9.72        | 0.1         | Obstructive azoospermia       | Hormone test before surgery     |
| Histological analysis                          | Young | Y5         | 31          | 170         | 71          | 3.79      | 5.72     | 3.83            | 24         | 8.72        | 0.2         | Obstructive azoospermia       | Hormone test before surgery     |
| Histological analysis                          | Young | Y6         | 26          | 181         | 79          | 3.75      | 2.84     | 8.22            | 22         | 13.38       | 0.3         | Obstructive azoospermia       | Hormone test before surgery     |
| Histological analysis                          | Young | Y7         | 30          | 175         | 80          | 4.45      | 3.73     | 4.83            | 22         | 8.75        | 0.2         | Obstructive azoospermia       | Hormone test before surgery     |
| Histological analysis                          | Young | Y8         | 31          | 174         | 74          | 2.66      | 3.73     | 3.39            | 27         | 9.58        | 0.1         | Obstructive azoospermia       | Hormone test before surgery     |
| Histological analysis                          | Young | Y9         | 28          | 173         | 71          | 5.1       | 3.25     | 3.28            | 20         | 12.59       | 0.2         | Obstructive azoospermia       | Hormone test before surgery     |
| Histological analysis                          | Young | Y10        | 29          | 171         | 75          | 3.47      | 3.71     | 3.18            | 22         | 11.33       | 0.2         | Obstructive azoospermia       | Hormone test before surgery     |
| Single-cell RNA seq;<br>Histological analysis. | Old   | O1         | 61          | 175         | 78          |           |          | 5.15            | <10        |             | 0.3         | Testicular cyst               | Hormone test before orchiectomy |
| Single-cell RNA seq;<br>Histological analysis. | Old   | O2         | 87          | 164         | 60          | 37.53     | 23.43    | 0.18            | <10        | 10.78       | 0.3         | Prostatic cancer              | Hormone test after orchiectomy  |
| Single-cell RNA seq;<br>Histological analysis. | Old   | O3         | 70          | 177         | 54          |           |          |                 |            |             |             | Prostatic cancer              | No data of hormone test         |
| Histological analysis                          | Old   | O4         | 80          | 167         | 55          | 31.49     | 25.43    | 0.25            | 21         | 15.91       | 0.2         | Prostatic cancer              | Hormone test after orchiectomy  |
| Histological analysis                          | Old   | O5         | 75          | 168         | 58          | 5.93      | 6.06     | 0.15            | 16         | 16.44       | 0.2         | Prostatic cancer              | Hormone test after orchiectomy  |
| Histological analysis                          | Old   | O6         | 74          | 162         | 62          | 7.08      | 13.11    | 0.16            | <10        | 11.48       | 0.1         | Prostatic cancer              | Hormone test after orchiectomy  |
| Histological analysis                          | Old   | O7         | 71          | 170         | 70          | 7.85      | 9.15     | 4.23            | 25         | 17.3        | 0.3         | Prostatic cancer              | Hormone test before orchiectomy |
| Histological analysis                          | Old   | O8         | 70          | 160         | 62          | 4.82      | 1.86     | 3.87            | 22         | 9.99        | 0.2         | Prostatic cancer              | Hormone test before orchiectomy |
| Histological analysis                          | Old   | O9         | 79          | 167         | 58          | 16.26     | 6.58     | 4.98            | 15         | 7.35        | 0.1         | Prostatic cancer              | Hormone test before orchiectomy |
| Histological analysis                          | Old   | O10        | 86          | 170         | 76          | 16.75     | 6.16     | 9.01            | 15.53      | 32          | 0.2         | Prostatic cancer              | Hormone test before orchiectomy |
