# Supplementary material for: Single-cell RNA sequencing reveals transcriptomic landscape and potential targets for human testicular ageing
Source: PubMed Central journal article supplement — Hum Reprod. 2024 Sep 6;39(10):2189–209. doi: 10.1093/humrep/deae199 (PMC11447013; doi:10.1093/humrep/deae199), 2024-09-06
Supplement: deae199_supplementary_table_s2.pdf [file deae199_supplementary_table_s2.pdf]

**Supplementary Table S2.** Gene lists for base-excision repair (BER), DNA damage response, detection of DNA damage, and senescence-associated secretory phenotype (SASP); related to [Figs 3 and 4](#).

| BER      | DNA damage response, detection of<br>DNA damage | SASP     |
|----------|-------------------------------------------------|----------|
| APEX1    | PARP1                                           | CCL2     |
| APEX2    | CFAP410                                         | CSF1     |
| FEN1     | PCNA                                            | CSF2RB   |
| HMGB1    | POLD1                                           | CTSB     |
| HMGB1P1  | POLD2                                           | ICAM1    |
| HMGB1P40 | RFC1                                            | IGF2R    |
| LIG1     | RFC2                                            | IGFBP6   |
| LIG3     | RFC3                                            | IGFBP5   |
| MBD4     | RFC4                                            | IL15     |
| MPG      | RFC5                                            | IL6ST    |
| MUTYH    | RPA1                                            | IL13     |
| NEIL1    | RPA2                                            | MMP9     |
| NEIL2    | RPA3                                            | PIGF     |
| NEIL3    | RPS3                                            | PTGES    |
| NTHL1    | RPS27A                                          | PLAU     |
| OGG1     | SOX4                                            | SERPINE1 |
| PARP1    | UBA52                                           | RPS6KA5  |
| PARP2    | UBB                                             | TIMP1    |
| PARP3    | UBE2B                                           | TIMP2    |
| PARP4    | USP1                                            | TNFRSF1A |
| PCNA     | CUL4B                                           | TNFRSF1B |
| POLB     | CUL4A                                           |          |
| POLD1    | RBX1                                            |          |
| POLD2    | POLD3                                           |          |
| POLD3    | TREX1                                           |          |
| POLD4    | DTL                                             |          |
| POLE     | RAD18                                           |          |
| POLE2    | WDR48                                           |          |
| POLE3    | POLD4                                           |          |
| POLE4    | MRPS35                                          |          |
| POLL     | MRPS26                                          |          |
| SMUG1    | MRPS11                                          |          |
| TDG      | MRPS9                                           |          |
| UNG      |                                                 |          |
| XRCC1    |                                                 |          |
