# Supplementary material for: Single-cell RNA sequencing reveals transcriptomic landscape and potential targets for human testicular ageing
Source: PubMed Central journal article supplement — Hum Reprod. 2024 Sep 6;39(10):2189–209. doi: 10.1093/humrep/deae199 (PMC11447013; doi:10.1093/humrep/deae199), 2024-09-06
Supplement: deae199_supplementary_table_s3.pdf [file deae199_supplementary_table_s3.pdf]

**Supplementary Table S3.** The antibodies used in this study; related to the Materials and Methods.

| Antibodies                 | Dilution | Distributor (Cat.No)     |
|----------------------------|----------|--------------------------|
| Rabbit anti-UCHL1          | 1:200    | CST (13179)              |
| PNA                        | 1:500    | Sigma (L7381)            |
| Rabbit anti-DDX4           | 1:400    | CST (8761S)              |
| Rabbit anti-NTHL1          | 1:400    | Abcam (ab191413)         |
| Rabbit anti-APEX1          | 1:400    | Abcam (ab189474)         |
| Rabbit anti-SOX9           | 1:400    | Millipore (AB5535)       |
| Rabbit anti-CYP17A1        | 1:400    | CST (94004s)             |
| Mouse anti- $\alpha$ -SMA  | 1:400    | Arigo (ARG52485)         |
| Mouse anti-8-OHdG          | 1:200    | Santa Cruz (sc66036)     |
| Rabbit anti-PTN            | 1:100    | Proteintech (27117-1-AP) |
| Mouse anti-HSD3B1          | 1:100    | Santa Cruz (sc515120)    |
| Rabbit anti-STRA8          | 1:200    | Millipore (ABN1656)      |
| Goat Anti-rabbit IgG AF555 | 1:1000   | Invitrogen (A32732)      |
| Goat Anti-rabbit IgG AF488 | 1:1000   | Invitrogen (A32731)      |
| Goat Anti-mouse IgG AF555  | 1:1000   | Invitrogen (A32727)      |
| Goat Anti-mouse IgG AF488  | 1:1000   | Invitrogen (A32723)      |
