# Supplementary material for: Single-cell RNA sequencing reveals transcriptomic landscape and potential targets for human testicular ageing
Source: PubMed Central journal article supplement — Hum Reprod. 2024 Sep 6;39(10):2189–209. doi: 10.1093/humrep/deae199 (PMC11447013; doi:10.1093/humrep/deae199), 2024-09-06
Supplement: deae199_supplementary_table_s4.pdf [file deae199_supplementary_table_s4.pdf]

**Supplementary Table S4.** Primers used for qRT-PCR analysis; related to the Materials and Methods.

| Gene    | Forward primer         | Reverse primer          |
|---------|------------------------|-------------------------|
| SF1     | CCGGCTACCACTACGGAC     | CTGCGTCTGTCCGATCTTGC    |
| CYP17A1 | GCTGCTTACCCTAGCTTATTGT | ACCGAATAGATGGGGCCATATTT |
| HSD3B1  | CACATGGCCCGCTCCATAC    | GTGCCGCCGTTTTTCAGATTTC  |
| HSD17B3 | CTGGCGAAGTGCGTGAGATT   | GAGTACGCTTTCCCAATTCCA   |
| INSL3   | ACCCAGAGATGCGTGAGAA    | CTCCAGCCACTGTAGCAACTC   |
